# Supplementary material for: Electrostatic-induced synthesis of tungsten bronze nanostructures with excellent photo-to-thermal conversion behavior
Source: Royal Society of Chemistry journal article supplement (doi:10.1039/c3ta11479a), 2013-01-01
Supplement: c3ta11479a.pdf [file c3ta11479a.pdf]

Supporting information for:

## **Electrostatic-Induced Synthesis of Tungsten Bronze Nanostructures with Excellent Photo-to-thermo Conversion Behavior**

Gaoxiang Liu, Sinong Wang, Yuting Nie, Xuhui Sun, Yahong Zhang and Yi Tang\*

### **NIR Heating Assay Procedure**

In order to investigate the photothermal conversion property of the products, each kind of as-prepared nano-HTBs was weighed for appropriate amounts using a micro balance and transferred to plastic centrifuge tubes. Distilled water was added to the tubes to prepare nano-HTB dispersions with concentrations of 40, 60, 80, 100, 120 and 140  $\mu\text{g/mL}$ . These tubes were placed in an ultrasonic waterbath with a constant temperature of 24  $^{\circ}\text{C}$ , and kept being sonicated to make sure that the HTB nanomaterials were finely dispersed in the suspensions. Aliquots (200  $\mu\text{L}$ ) of these dispersions were then transferred to vacant centrifuge tubes using a pipette. The tubes were fixed with their apertures upward and illuminated by continuous NIR laser at a wavelength of 808 nm (power density: 4  $\text{W cm}^{-2}$ , spot size: 5 mm). The irradiation time was set as 30, 60, 90, 120, 150 or 180 s. Pre- and post-irradiation temperatures of the aliquots were measured using a handheld thermocouple thermometer (YC 811, Tenmars). For the blank run test, only distilled water was added to a plastic centrifuge tube, then it was treated and measured in the same way as the nano-HTB dispersions. A schematic diagram of the set-up is presented below.

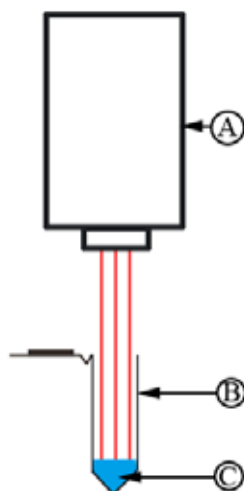

**Diagram S1.** A simple schematic illustration of the set-up for the NIR heating assay. The labelled components are as follows: A) NIR laser device, B) plastic centrifuge tube, C) nano-HTB dispersion.

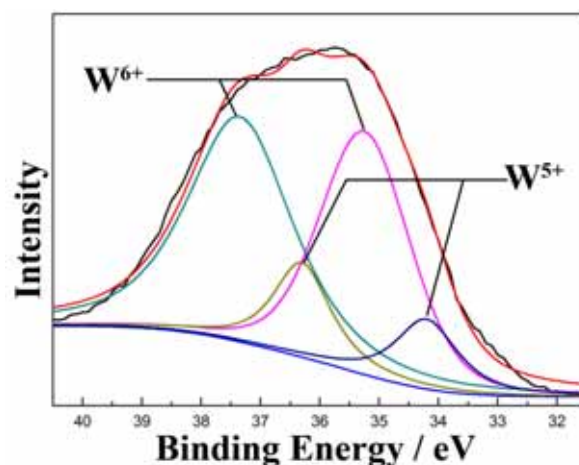

**Fig. S1.** W<sub>4f</sub> core-level XPS spectrum of Na-HTB nanorods. The chemical formula of this HTB structure is calculated to be Na<sub>0.196</sub>WO<sub>3</sub>.

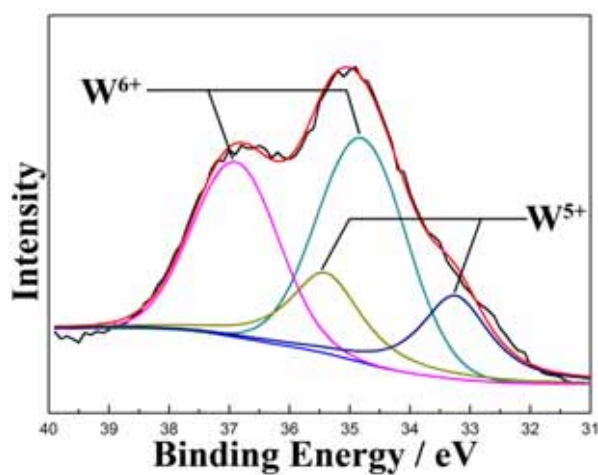

**Fig. S2.** W<sub>4f</sub> core-level XPS spectrum of Cs-HTB nanowires. The chemical formula of this HTB structure is calculated to be Cs<sub>0.313</sub>WO<sub>3</sub>.

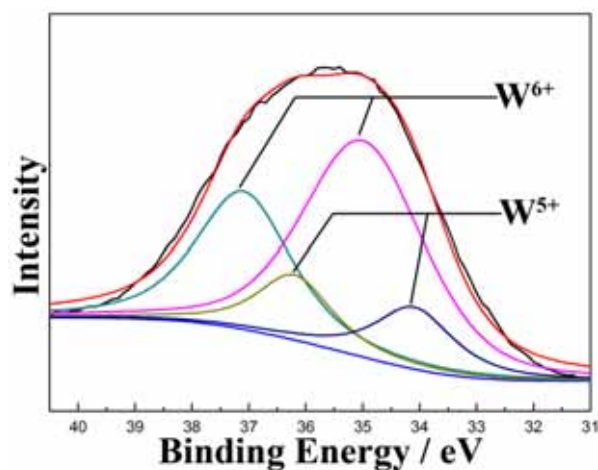

**Fig. S3.** W<sub>4f</sub> core-level XPS spectrum of NH<sub>4</sub>-HTB nanowires. The chemical formula of this HTB structure is calculated to be (NH<sub>4</sub>)<sub>0.33</sub>WO<sub>3</sub>.

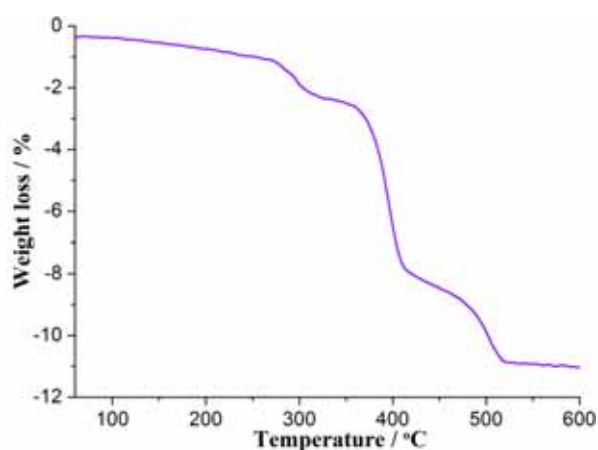

**Fig. S4.** Calibrated TG result of the product obtained after 2 h of hydrothermal reaction.

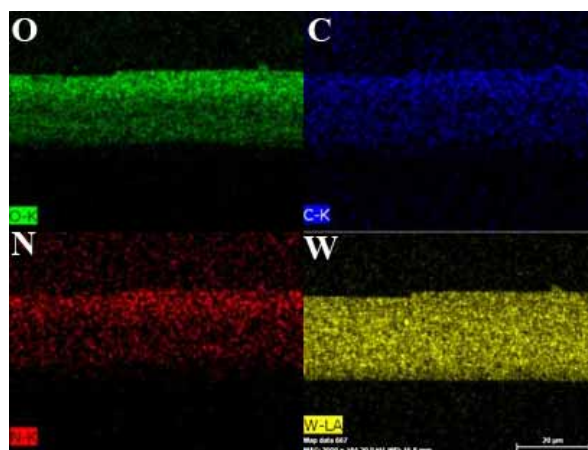

**Fig. S5.** EDX mapping results of  $\text{H}^+\text{EDA}-\text{WO}_4^{2-}$  complexes obtained after 2 h of hydrothermal reaction.

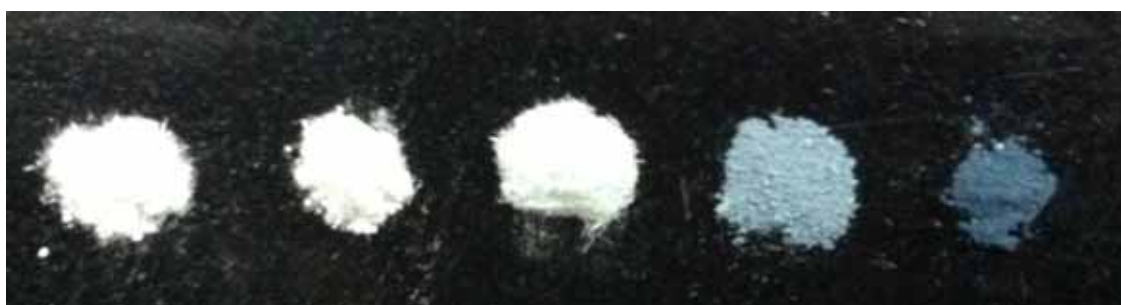

**Fig. S6.** The color transformation of products upon different reaction time. From left to right: 2, 7, 10, 12 and 18 h.
